# Supplementary material
Source: PubMed Central journal article supplement (PMC3093868)
Supplement: supp_M110.177345_jbc.M110.177345-3.pdf [file supp_M110.177345_jbc.M110.177345-3.pdf]

**Fig. S3**

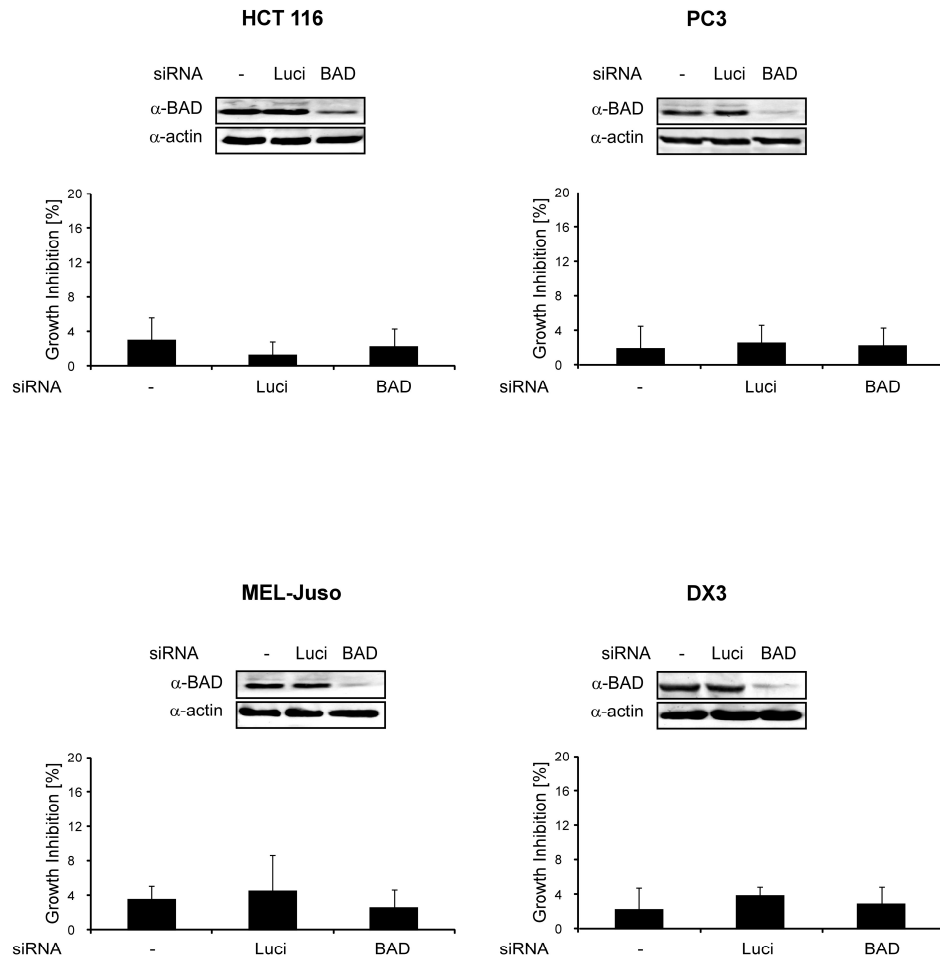

**Fig. S3.** BAD is not required for efficient proliferation in RAS mutant (HTC 116, MEL-Juso, and DX3) and B-RAF/RAS wild type (PC3) tumor cells. The indicated cell lines were transfected with siRNAs against BAD or luciferase. Two days post transfection, endogenous actin, knock-down of endogenous BAD at protein level (see inserts) as well as the effect of BAD knock-down on cell growth was monitored.
